# Supplementary material for: Synthesis and properties of novel heterocycle-fused TTF-type electron donors: bis(propylenethio)tetrathiafulvalene (BPT-TTF), bis(propyleneseleno)tetrathiafulvalene (BPS-TTF), and their tetraselenafulvalene analogues (BPT-TSF and BPS-TSF)
Source: Royal Society of Chemistry journal article supplement (doi:10.1039/b009700o), 2001-01-01
Supplement: b009700o.doc [file b009700o.doc]

**for RSC's Electronic Supplementary Information service**

**Experimental**

**General.** Melting points are uncorrected. Nuclear magnetic resonance spectra were obtained in the indicated deuterated solvent with a JEOL Lambda 400 spectrometer operating at 400 MHz for 1H and 100 MHz for 13C with TMS as internal reference; chemical shifts () are reported in parts per million. Mass spectral data were obtained on a Shimadzu QP-2000 spectrometer using an electron impact ionization procedure (70 eV). The molecular ion peaks of the selenium-containing compounds showed a typical selenium isotropic pattern, and all the selenium-containing mass peaks are reported for 80Se. Infrared spectra were obtained on a Shimadzu FTIR-8100A spectrometer. Cyclic voltammetry was carried out on a Hokuto Denko HA-301 potentiostat equipped with a Hokuto Denko HB-104 function generator. Elemental analyses were performed by Mr. Hideaki Iwatani, Microanalytical Laboratory in Department of Applied Chemistry, Faculty of Engineering, Hiroshima University. All chemicals and solvents are of reagent grade. All reactions were carried out under a nitrogen atmosphere with dry solvents. Column chromatography was carried out with Daisogel IR-60 (63–210 m). Preparative gel permeation chromatography (GPC) was performed on Japan Analytical Industry Co., Ltd. LC-908 equipped with a JAI-GEL 1H, 2H column assembly. Selenium powder (red)14 and carbon diselenide15 were synthesized according to the literature procedures.

**2-(4-Pentynyl-1-oxy)tetrahydro-2*H*-pyran (9)**8

To a solution of 3-pentyn-1-ol (10g, 0.122 mol) and *p*-toluenesulfonic acid monohydrate (7.0 mg, 0.04 mmol) in dichloromethane (60 mL), 3,4-dihydro-2H-pyran (11.27 g, 0.13 mmol) was added dropwise at 0 °C. The resulting mixture was stirred at room temperature overnight and then quenched by addition of powdery potassium carbonate (200 mg, 1.4 mmol). After stirring 1 h at room temperature, the mixture was filtered to remove insoluble solid and concentrated *in vacuo*. The THP-protected pentyn-1-ol was obtained as a colorless liquid by vacuum distillation (bp 85 °C/10 torr, ref8 90–94 °C/10 mmHg). Yield: 16.2 g (80%).

**4-Methylthio-5-[3-(tetrahydropyran-2-yloxy)propyl]-1,3-dithiole-2-thione (11 (X = S)).**

1H NMR (CDCl3)  1.48–1.90 (m, 8H, CH2), 2.43 (s, 3H, CH3), 2.82-2.95 (m, 2H, CH2), 3.40–3.88 (m, 4H, CH2) 4.58 (m, 1H, CH); 13C NMR (CDCl3)  19.99, 20.28, 25.30, 26.54, 30.17, 30.54, 62.36, 65.70, 98.86, 130.54, 148.95, 211.58; MS *m/z* 322 (M+); IR (neat) 1064.8 cm–1 (C=S); Anal. Calcd for C12H18O2S4: C, 44.69; H, 5.63%. Found: C, 44.67; H, 5.66%.

**4-Methylseleno-5-[3-(tetrahydropyran-2-yloxy)propyl]-1,3-dithiole-2-thione (11 (X = Se)).**

Yellow oil (83% yield): 1H NMR (CDCl3)  1.52–1.90 (m, 8H, CH2), 2.32 (s, 3H, CH3), 2.82–2.96 (m, 2H, CH2), 3.40–3.90 (m, 4H, CH2), 4.58 (m, 1H, CH); 13C NMR (CDCl3)  10.68, 19.38, 25.19, 27.99, 30.22, 30.43, 62.22, 65.52, 98.70, 120.28, 149.18, 213.51; MS *m/z* 370 (M+); IR (neat) 1062.9 cm–1 (C=S); Anal. Calcd for C12H18O2S3Se1: C, 39.02; H, 4.91%. Found: C, 39.15; H, 4.96%.

**4-(3-Hydroxypropyl)-5-methylthio-1,3-dithiole-2-thione (12 (X = S)).**

1H NMR (CDCl3)  1.81–1.88 (m, 2H, CH2), 2.41 (br s, 1H, OH), 2.44 (s, 3H, CH3), 2.87–2.90 (m, 2H, CH2), 3.70 (t, *J* = 6.2 Hz, CH2); 13C NMR (CDCl3)  20.26, 25.99, 32.64, 60.87, 130.77, 148.72, 211.52; MS *m/z* 238 (M+); IR (neat) 3100-3700 (OH), 1062.9 cm–1 (C=S)

Anal. Calcd for C7H10O1S4: C, 35.27; H, 4.23%. Found: C, 35.22; H, 4.22%.

**4-(3-Hydroxypropyl)-5-methylseleno-1,3-dithiole-2-thione (12 (X = Se)).**

1H NMR (CDCl3)  1.82–1.89 (m, 2H, CH2), 1.90 (br s, 1H, OH), 2.34 (s, 3H, CH3), 2.88-2.92 (m, 2H, CH2), 3.71 (t, *J* = 6.2 Hz, 2H, CH2); 13C NMR (CDCl3)  10.89, 27.50, 32.80, 60.83, 120.65, 149.11, 213.66; MS *m/z* 286 (M+); IR (neat) 3100-3700 (OH), 1062.9 cm–1 (C=S). Anal. Calcd for C7H10O1S3Se1: C, 29.47; H, 3.53%. Found: C, 29.44; H, 3.53%.

**4-Methylthio-5-(3-tosyloxypropyl)-1,3-dithiole-2-thione (13 (X = S))**

mp 62–63 °C; 1H NMR (CDCl3)  1.89–1.96 (m, 2H, CH2), 2.41 (s, 3H, CH3), 2.47 (s, 3H, CH3), 2.80–2.84 (m, 2H, CH2), 4.08 (t, *J* = 6.0 Hz, 2H, CH2), 7.37 (d, *J* = 8.2 Hz, 2H, ArH), 7.79 (d, *J* = 8.2 Hz, 2H, ArH); 13C NMR (CDCl3) 20.32, 21.72, 25.71, 29.24, 68.45, 127.91, 130.01, 131.76, 132.68, 145.21, 146.46, 211.07; MS *m/z* 392 (M+); IR (KBr) 1360.0, 1176.7 (S=O), 1064.8 (C=S); Anal. Calcd for C14H16O3S5: C, 42.83; H, 4.11%. Found: C, 42.80; H, 4.08%.

**4-Methylseleno-5-(3-tosyloxypropyl)-1,3-dithiole-2-thione (13 (X = Se))**

1H NMR (CDCl3)  1.90–1.97 (m, 2H, CH2), 2.30 (s, 3H, CH3), 2.46 (s, 3H, CH3), 2.81–2.85 (m, 2H, CH2), 4.07 (t, *J* = 6.0 Hz, 2H, CH2), 7.37 (d, *J* = 8.1 Hz, 2H, ArH), 7.78 (d, *J* = 8.1 Hz, 2H, ArH); 13C NMR (CDCl3)10.82, 21.50, 27.08, 29.16, 68.35, 121.40, 127.40, 127.63, 129.81, 132.37, 144.99, 147.04, 213.03; MS *m/z* 440 (M+); IR (neat) 1352.3, 1174.8 (S=O), 1057.1 cm–1 (C=S). Anal. Calcd for C14H18O3S4Se1: C, 38.26; H, 3.67%. Found: C, 38.26; H, 3.62%.

**4,5,6-Trihydrothiino[2,3-*d*]-1,3-dithiole-2-thione (14 (X = S))**

mp 58–59 °C; 1H NMR (CDCl3)  2.22–2.28 (m, 2H, CH2), 2.60 (t, *J* = 6.3 Hz, 2H, CH2), 3.11–3.14 (m, 2H, CH2); 13C NMR  22.59, 24.31, 28.26, 127.86, 128.69, 209.56; MS *m/z* 206 (M+); IR (KBr) 1053.3 cm–1 (C=S); Anal. Calcd for C6H6S4: C, 34.92; H, 2.93%. Found: C, 34.93; H, 2.92%.

**4,5,6-Trihydroselenino[2,3-*d*]-1,3-dithiole-2-thione (14 (X = Se))**

mp 74–75 °C; 1H NMR (CDCl3)  2.29–2.35 (m, 2H, CH2), 2.58–2.62 (t, *J* = 6.2 Hz, 2H, CH2), 3.19–3.22 (m, 2H, CH2); 13C NMR  22.01, 23.49, 25.74, 117.08, 131.04, 211.21; MS *m/z* 254 (M+); IR (KBr) 1059 cm–1 (C=S); Anal. Calcd for C6H6S3Se1: C, 28.46; H, 2.39%. Found: C, 28.51; H, 2.38%.

**4,5,6-Trihydrothiino[2,3-*d*]-1,3-dithiol-2-one (15 (X = S)).**

mp 55–57 °C; 1H NMR (CDCl3)  2.25–2.31 (m, 2H, CH2), 2.54 (t, *J* = 6.3 Hz, 2H, CH2), 3.13–3.16 (m, 2H, CH2); 13C NMR  23.66, 24.63, 29.02, 117.07, 117.52, 190.50; MS *m/z* 254 (M+); IR (KBr) 1645.5 cm–1 (C=O); Anal. Calcd for C6H6O1S3: C, 37.87; H, 3.18%. Found: C, 37.68; H, 3.17%.

**4,5,6-Trihydroselenino[2,3-*d*]-1,3-dithiol-2-one (15 (X = Se)).**

mp 75–76 °C; 1H NMR (CDCl3) 2.31–2.37 (m, 2H, CH2), 2.52–2.55 (t, *J* = 6.0 Hz, 2H, CH2), 3.21–3.24 (m, 2H, CH2); 13C NMR  22.77, 24.29, 26.21, 106.44, 119.55, 192.06; MS *m/z* 238 (M+); IR (KBr) 1645.5 cm–1 (C=O); Anal. Calcd for C6H6S2O1Se1: C, 30.38; H, 2.55%. Found: C, 30.54; H, 2.59%.

**4-Methylthio-5-[3-(tetrahydropyran-2-yloxy)propyl]-1,3-diselenole-2-selone (16 (X = S)).**

1H NMR (CDCl3)  1.50–2.00 (m, 8H, CH2), 2.45 (s, 3H, SCH3), 2.93–3.06 (m, 2H, CH2), 3.42–3.90 (m, 4H, CH2), 4.58 (m, 1H, CH); 13C NMR (CDCl3)  19.53, 21.49, 25.30, 28.90, 30.55, 31.08, 62.39, 65.77, 98.87, 139.36, 160.15, 206.82; MS *m/z* 466 (M+); IR (neat) 906 cm–1 (C=Se). Anal. Calcd for C12H18O2S1Se3: C, 31.12; H, 3.92%. Found: C, 30.82; H, 3.83%.

**4-Methylseleno-5-[3-(tetrahydropyran-2-yloxy)propyl]-1,3-diselenole-2-selone (16 (X = Se)).**

1H NMR (CDCl3)  1.50–1.93 (m, 8H, CH2), 2.35 (s, 3H, CH3), 2.93–3.07 (m, 2H, CH2), 3.42–3.89 (m, 4H, CH2), 4.59 (m, 1H, CH); 13C NMR (CDCl3)  11.17, 19.55, 25.32, 30.59, 30.64, 31.29, 62.41, 65.73, 98.89, 127.99, 160.23, 209.74; MS *m/z* 514 (M+); IR (neat) 906.7 cm–1 (C=Se). Anal. Calcd for C12H18O2Se4: C, 28.25; H, 3.56%. Found: C, 28.17; H, 3.51%.

**4,4'(5')-Bis(methylthio)-5,5'(4')-bis[3-(tetrahydropyran-2-yloxy)propyl]tetraselenafulvalene (17 (X = S)).**

1H NMR (CDCl3)  1.50–1.85 (m, 16H, CH2), 2.343 and 2.334 (s, 6H, CH3 ), 2.65–2.80 (m, 4H, CH2), 3.39–3.80 (m, 4H, CH2), 3.48–3.90 (m, 4H, CH2), 4.59 (m, 2H, CH); 13C NMR (CDCl3)  19.51, 20.27, 25.40, 29.37, 30.39, 30.62, 62.26, 66.14, 98.78, 104.91, 144.51; MS *m/z* 772 (M+). Anal. Calcd for C24H36O4S2Se4: C, 37.51; H, 4.72%. Found: C, 37.38; H, 4.62%

**4,4'(5')-Bis(methylseleno)-5,5'(4')-bis[3-(tetrahydropyran-2-yloxy)propyl]tetraselenafulvalene (17 (X = Se)).**

1H NMR (CDCl3)  1.48–1.90 (m, 16H, CH2), 2.22 and 2.26 (s, 6H, CH3), 2.65–2.80 (m, 4H, CH2), 3.39–3.90 (m, 8H, CH2), 4.59 (m, 2H, CH); 13C NMR (CDCl3)  10.86, 19.51, 25.41, 30.49, 30.63, 31.06, 62.26, 66.07, 98.77, 106.71, 143.56; MS *m/z* 868 (M+). Anal. Calcd for C24H36O4Se6: C, 33.43; H, 4.21%. Found: C, 33.26; H, 4.18%

**4,4'(5')-Bis(3-hydroxypropyl)-5,5'(4')-bis(methylthio)tetraselenafulvalene (18 (X = S)).**

1H NMR (CDCl3)  1.75–1.82 (m, 4H, CH2), 2.04 (br s, 2H, OH), 2.356 and 2.360 (s, 6H, CH3), 2.70–2.75 (m, 4H, CH2), 3.65–3.69 (m, 4H, CH2); 13C NMR (CDCl3)  20.76, 28.72, 32.84 61.31, 104.93, 123.97, 144.10; MS *m/z* 604 (M+); IR (KBr) 3000–3600 cm–1 (OH). Anal. Calcd for C14H20O2S2Se4: C, 28.01; H, 3.36%. Found: C, 28.07; H, 3.39%.

**4,4'(5')-Bis(3-hydroxypropyl)-5,5'(4')-bis(methylseleno)tetraselenafulvalene (18 (X = Se)).**

mp 99–101 °C (melt with decomposition); 1H NMR (CDCl3)  1.76–1.82 (m, 4H, CH2), 1.86 (br s, 2H, OH), 2.273 and 2.275 (s, 6H, CH3), 2.69–2.74 (m, 4H, CH2), 3.66–3.69 (m, 4H, CH2); 13C NMR (CDCl3)  11.05, 30.39, 32.93, 61.29, 106.76, 112.94, 143.23; MS *m/z* 700 (M+); IR (KBr) 3000–3600 cm–1 (OH). Anal. Calcd for C14H20O2Se6: C, 24.23; H, 2.90%. Found: C, 24.21; H, 2.90%.

**4,4'(5')-Bis(methylthio)-5,5'(4')-bis[3-(tosyloxy)propyl]tetraselenafulvalene (19 (X = S)).**

mp 109–110 °C (melt with decomposition); 1H NMR (CDCl3)  1.82–1.89 (m, 4H, CH2), 2.31 (s, 6H, CH3), 2.46 (s, 6H, CH3), 2.63–2.67 (m, 4H, CH2), 4.06 (t, *J* = 6.0 Hz, 4H, CH2), 7.36 (d, *J* = 8.1 Hz, 4H, ArH), 7.79 (d, *J* = 8.1 Hz, 4H, ArH); 13C NMR (CDCl3)  11.02, 20.17, 21.64, 28.39, 29.47, 30.11, 69.00, 104.88, 125.38, 127. 82, 129.86, 132.81, 142.17, 144.84; IR (KBr) 1362 cm–1 (SO2); Anal. Calcd for C28H32O6S4Se4: C, 37.01; H, 3.55%. Found: C, 36.82; H, 3.50%.

**4,4'(5')-Bis(methylseleno)-5,5'(4')-bis[3-(tosyloxy)propyl]tetraselenafulvalene (19 (X = Se)).**

mp 104–105 °C (melt with decomposition); 1H NMR (CDCl3)  1.82–1.89 (m, 4H, CH2), 2.24 (s, 6H, CH3), 2.46 (s, 6H, CH3), 2.63–2.67 (m, 4H, CH2), 4.06 (t, *J* = 6.0 Hz, 4H, CH2), 7.36 (d, *J* = 8.1 Hz, 4H, ArH), 7.79 (d, *J* = 8.1 Hz, 4H, ArH); 13C NMR (CDCl3)  11.02, 21.64, 29.34, 29.48, 30.11, 53.41, 68.97, 106.78, 114.35, 127. 93, 129.94, 132.96, 141.55, 144.90; IR (KBr) 1356.1 cm–1 (SO2); Anal. Calcd for C28H32O6S2Se6: C, 33.55; H, 3.22%. Found: C, 33.28; H, 3.04%.

**Combustive microanalyses of radical cation salts**

**5**•PF6: Anal. Calcd for C12H12S6P1F6: C, 29.20; H, 2.45%. Found: C, 29.45; H, 2.64%; **5**•AsF6: Anal. Calcd for C12H12S6As1F6: C, 26.82; H, 2.25%. Found: C, 27.01; H, 2.36%; **6**•PF6: Anal. Calcd for C12H12S4Se2P1F6: C, 24.54; H, 2.06%. Found: C, 24.70; H, 2.21%; **6**•AsF6: Anal. Calcd for C12H12S4Se2As1F6: C, 22.83; H, 1.92%. Found: C, 22.92; H, 1.92%; **6**•SbF6: Anal. Calcd for C12H12S4Se2Sb1F6: C, 21.25; H, 1.78%. Found: C, 21.11; H, 1.82%; **7**3•(BF4)2: Anal. Calcd for C36H36S6Se12B2F8: C, 24.26; H, 2.04%. Found: C, 24.18; H, 2.04%;
